# Supplementary material for: Total synthesis of floresolide B and Δ6,7-Z-floresolide B
Source: Royal Society of Chemistry journal article supplement (doi:10.1039/b517385j), 2006-01-01
Supplement: b517385j.pdf [file b517385j.pdf]

Selected data for synthetic **2**:  $R_f = 0.42$  (silica gel, ethyl acetate/hexanes = 1/1); IR (film)  $\nu_{\max}$  3555, 2931, 1701, 1454, 1354, 1190, 1160  $\text{cm}^{-1}$ ;  $^1\text{H}$  NMR (500 MHz,  $\text{CDCl}_3$ ):  $\delta = 6.49$  (s, 2 H), 6.42 (m, 1 H), 5.07 (m, 1 H), 4.96 (s, 1 H), 4.87 (d,  $J = 1.0$  Hz, 1 H), 4.62 (s, 1 H, OH), 3.62 (d,  $J = 10.0$  Hz, 1 H), 3.48 (dd,  $J = 12.8, 4.8$  Hz, 1 H), 2.82 (dd,  $J = 13.9, 8.4$  Hz, 1 H), 2.70 (m, 1 H), 2.20 (m, 1 H), 2.10 (m, 2 H), 1.76 (m, 2 H), 1.75 (m, 1 H), 1.64 (s, 3 H), 1.25 (s, 3 H);  $^{13}\text{C}$  NMR (125 MHz,  $\text{CDCl}_3$ ):  $\delta = 167.2, 152.5, 148.9, 144.3, 136.7, 136.3, 134.2, 134.1, 133.2, 127.9, 112.9, 108.9, 38.7, 33.8, 30.0, 29.7, 22.9, 22.1$  ppm; HRMS (ESI-TOF): calcd for  $\text{C}_{21}\text{H}_{24}\text{O}_3$  : 325.1798 [ $M+\text{H}^+$ ], found 325.1788.
